# Supplementary material
Source: publisher figshare collection journal article supplement (https://geolsoc.figshare.com/ndownloader/files/20024786)
Supplement: Supplementary file 1 [file 20024786]

## Sheet: Feldespar-Represent analyses
Table 1. Representative EMP analyses of feldspar from the Tabaquito batholith.
Label	TAB-11						TAB-34					TAB-32
Rock Typea	Grd						Grd					MME
SiO2 wt%	66.02						65.05					55.04
Phaseb	Plg	Plg	Plg	Plg	Kfs	Kfs	Plg	Plg	Plg	Kfs	Kfs	Plg	Plg	Plg	Plg	Plg	Plg	Plg	Plg	Plg
Texturec	c	r	c	r	c	r	c	r	c	r	c	phen, a-z	phen, c	mt, r	phen, r	phen, c	phen, r	mt, r	mt, c	mt, c
SiO2	58.954	61.494	56.874	60.145	65.266	65.218	57.12	60.51	58.91	65.05	65.37	62.75	56.83	64.07	58.9	57.63	64.48	61.36	56.57	58.08
Al2O3	27.131	25.51	28.201	26.191	19.04	19.06	26.66	24.77	25.93	17.97	17.77	23.33	26.77	22.83	25.17	25.71	23.11	24.55	27.12	26.07
FeO	0.152	0.195	0.152	0.135	0.086	0.044	0.1639	0.2775	0.0991	0.0723	0.1641	0.0856	0.1118	0.2242	0.1515	0.0791	0.0989	0.0395	0.1185	0.0987
SrO	0.086	0.056	0	0.043	0.021	0.021	0	0	0.0985	0.0226	0	0	0.0895	0	0.0197	0.0211	0.0598	0	0.0266	0
BaO	0	0	0.069	0	0.393	0.625	0	0	0	0.322	0.1836	0	0.2289	0	0	0.0458	0	0.1374	0	0
CaO	8.828	6.331	10.178	7.484	0.042	0.023	9.56	6.91	8.75	0.0234	0.0572	5.23	9.64	4.52	8.03	8.47	4.56	6.63	9.77	8.64
Na2O	6.486	7.709	5.676	6.889	1.163	0.483	6.05	7.19	6.59	0.9085	1.2197	8.37	5.71	9.17	7.05	6.69	9.04	7.99	6.16	6.47
P2O5	0.011	0	0.008	0.01	0.002	0	0.0062	0.0375	0.0031	0.0061	0	0.0438	0.034	0.0345	0.0373	0	0	0.025	0.0402	0.0155
K2O	0.278	0.428	0.299	0.357	15.063	16.072	0.1998	0.2995	0.2409	15.75	15.26	0.3201	0.1692	0.33	0.1886	0.1515	0.2719	0.2014	0.1243	0.133
Total	101.93	101.72	101.46	100.37	101.08	101.55	99.7599	99.9945	100.622	100.125	100.025	100.129	99.5834	101.179	99.5471	98.7975	101.621	100.933	99.9296	99.5072
Ab (mol. %)	56.169	67.0981	49.3689	61.1835	10.4802	4.36296	52.7723	64.1646	56.8899	8.05099	10.8016	72.9683	51.218	77.1568	60.7157	58.3249	77.0098	67.7907	52.9177	57.0949
Or (mol.%)	1.58404	2.45108	1.71113	2.08616	89.3106	95.5222	1.14669	1.75859	1.36832	91.8344	88.9184	1.8361	0.998591	1.82692	1.0687	0.869043	1.52401	1.1243	0.702574	0.772228
An (mol. %)	42.247	30.4508	48.92	36.7304	0.209148	0.114809	46.081	34.0768	41.7418	0.114592	0.279928	25.1956	47.7834	21.0163	38.2156	40.8061	21.4662	31.085	46.3797	42.1328
a Grd, granodiorite; MME, mafic microgranular enclave.
b Plg, plagioclase; Kfs, alkali feldspar.
c a-z, altered zone; c, core; r, rim; mt, matrix; phen, phenocryst.

## Sheet:  Feldespar - Complete analyses
Table 2. Complete EMP analyses of feldspar from the Tabaquito batholith.
Sample	Analysis Number	Location	SiO2	Al2O3	FeO	SrO	BaO	CaO	Na2O	P2O5	K2O	Total	Ab%	Or%	An%
TAB11	TAB 11 - C8 -Pl 81	core	56.717	28.375	0.304	0.069	0	9.982	5.86	0.135	0.318	101.76	50.5813	1.80601	47.6127
TAB11	TAB 11 - C8 -Pl 78	rim	58.954	27.131	0.152	0.086	0	8.828	6.486	0.011	0.278	101.93	56.169	1.58404	42.247
TAB11	TAB 11 - C8 -Pl 81	outer rim	61.494	25.51	0.195	0.056	0	6.331	7.709	0	0.428	101.72	67.0981	2.45108	30.4508
TAB11	TAB 11 - C4 -Pl 57	core	57.74	27.416	0.216	0.056	0	8.975	6.044	0.011	0.346	100.8	53.814	2.02697	44.159
TAB11	TAB 11 - C4 -Pl 59	rim	58.538	27.142	0.169	0.073	0	8.744	6.31	0.008	0.332	101.32	55.5438	1.92285	42.5334
TAB11	TAB 11 - C4 -Pl 60	outer rim	60.939	24.949	0.183	0.034	0	6.269	7.662	0.015	0.357	100.41	67.4403	2.0675	30.4922
TAB11	TAB 11 - C3 -Pl 64	core	58.294	26.989	0.206	0.117	0	8.667	6.189	0.006	0.428	100.9	54.9644	2.50095	42.5347
TAB11	TAB 11 - C3 -Pl 65	rim	56.874	28.201	0.152	0	0.069	10.178	5.676	0.008	0.299	101.46	49.3689	1.71113	48.92
TAB11	TAB 11 - C3 -Pl 66	outer rim	60.145	26.191	0.135	0.043	0	7.484	6.889	0.01	0.357	100.37	61.1835	2.08616	36.7304
TAB11	TAB 11 - C9 -Pl 76	-	65.266	19.04	0.086	0.021	0.393	0.042	1.163	0.002	15.063	101.08	10.4802	89.3106	0.209148
TAB11	TAB 11 - C9 -Pl 77	-	65.218	19.06	0.044	0.021	0.625	0.023	0.483	0	16.072	101.55	4.36296	95.5222	0.114809
TAB34	TAB 34 - C1 - Pl 3	core	57.12	26.66	0.1639	0	0	9.56	6.05	0.0062	0.1998	99.7599	52.7723	1.14669	46.081
TAB34	TAB 34 - C2 - Pl 9	rim	60.51	24.77	0.2775	0	0	6.91	7.19	0.0375	0.2995	99.9945	64.1646	1.75859	34.0768
TAB34	TAB 34 - C2 - Pl 10	core	58.91	25.93	0.0991	0.0985	0	8.75	6.59	0.0031	0.2409	100.622	56.8899	1.36832	41.7418
TAB34	TAB 34 - C5 - Pl 25	rim-core	58.83	26.01	0.1383	0	0.0917	8.67	6.44	0	0.3846	100.565	56.0774	2.2035	41.7191
TAB34	TAB 34 - C5 - Pl 26	rim	60.33	25.22	0.0791	0	0	7.31	7.25	0	0.3182	100.507	63.0495	1.82073	35.1297
TAB34	TAB 34 - C5 - Pl 27	core	57.51	26.56	0.2108	0.0575	0	9.2	6.16	0.0155	0.3526	100.066	53.6775	2.0216	44.3009
TAB34	TAB 34 - C5 - Pl 28	rim-core	58.37	25.92	0.0595	0.0089	0.276	8.82	6.64	0.0186	0.333	100.446	56.5922	1.86738	41.5404
TAB34	TAB 34 - C1 - Kfs 100	rim	65.05	17.97	0.0723	0.0226	0.322	0.0234	0.9085	0.0061	15.75	100.125	8.05099	91.8344	0.114592
TAB34	TAB 34 - C1 - Kfs 101	core	65.37	17.77	0.1641	0	0.1836	0.0572	1.2197	0	15.26	100.025	10.8016	88.9184	0.279928
TAB32	TAB 32 - C1 - Pl 6	phen c	57.93	26.61	0.172	0.0256	0.0461	9.02	6.38	0	0.2159	100.4	55.4467	1.23455	43.3187
TAB32	TAB 32 - C1 - Pl 9	phen zona osc	62.75	23.33	0.0856	0	0	5.23	8.37	0.0438	0.3201	100.129	72.9683	1.8361	25.1956
TAB32	TAB 32 - C1 - Pl 10	phen core	56.83	26.77	0.1118	0.0895	0.2289	9.64	5.71	0.034	0.1692	99.5834	51.218	0.998591	47.7834
TAB32	TAB 32 - C2 - Pl 30	matrix, rim	62.9	22.2	0.2244	0	0	4.82	8.66	0.0439	0.3328	99.1811	75.027	1.89707	23.076
TAB32	TAB 32 - C2 - Pl 31	matrix, rim-core	64.07	22.83	0.2242	0	0	4.52	9.17	0.0345	0.33	101.179	77.1568	1.82692	21.0163
TAB32	TAB 32 - C4 - Pl 52	phen rim	58.9	25.17	0.1515	0.0197	0	8.03	7.05	0.0373	0.1886	99.5471	60.7157	1.0687	38.2156
TAB32	TAB 32 - C4 - Pl 53	phen core	56.11	27.05	0.1514	0.0748	0.0917	10.07	5.97	0.0278	0.1484	99.6941	51.3224	0.839396	47.8382
TAB32	TAB 32 - C4 - Pl 54	phen core	57.77	25.97	0.2768	0	0	8.06	6.66	0	0.5595	99.2963	58.0033	3.20611	38.7906
TAB32	TAB 32 - C5 - Pl 70	phen rim-core. Alteration?	58.36	26.17	0.2636	0.0774	0.321	8.81	6.43	0.031	0.1803	100.643	56.3192	1.03906	42.6417
TAB32	TAB 32 - C5 - Pl 71	phen core	56.8	27.08	0.1317	0.1095	0.0917	9.97	6.02	0	0.1527	100.356	51.763	0.863899	47.3731
TAB32	TAB 32 - C5 - Pl 72	phen core	57.18	26.97	0.237	0.123	0	9.89	5.99	0	0.1854	100.575	51.7395	1.05367	47.2069
TAB32	TAB 32 - C5 - Pl 73	phen core	57.63	25.71	0.0791	0.0211	0.0458	8.47	6.69	0	0.1515	98.7975	58.3249	0.869043	40.8061
TAB32	TAB 32 - C5 - Pl 74	phen rim/matrix	64.48	23.11	0.0989	0.0598	0	4.56	9.04	0	0.2719	101.621	77.0098	1.52401	21.4662
TAB32	TAB 32 - C5 - Pl 75	phen core-rim	58.2	26.4	0.1713	0	0	8.98	6.47	0	0.1484	100.37	56.1144	0.846846	43.0388
TAB32	TAB 32 - C5 - Pl 76	phen core-rim	57.25	27.29	0.1842	0.0702	0.1832	9.8	6.14	0.0093	0.1517	101.079	52.6798	0.856371	46.4639
TAB32	TAB 32 - C5 - Pl 77	matrix rim	61.36	24.55	0.0395	0	0.1374	6.63	7.99	0.025	0.2014	100.933	67.7907	1.1243	31.085
TAB32	TAB 32 - C5 - Pl 78	matrix core	56.57	27.12	0.1185	0.0266	0	9.77	6.16	0.0402	0.1243	99.9296	52.9177	0.702574	46.3797
TAB32	TAB 32 - C5 - Pl 79	matrix core	61.36	24.06	0.1252	0	0.1372	6.23	8.27	0	0.2128	100.395	69.7729	1.18128	29.0458
TAB32	TAB 32 - C5 - Pl 80	matrix core	61.7	24.17	0.1581	0.0851	0	6.35	8.01	0	0.1935	100.667	68.7769	1.09318	30.1299
TAB32	TAB 32 - C5 - Pl 81	matrix	58.08	26.07	0.0987	0	0	8.64	6.47	0.0155	0.133	99.5072	57.0949	0.772228	42.1328
TAB32	TAB 32 - C5 - Pl 82	matrix rim	61.61	24.48	0.1974	0	0.1371	6.52	8.09	0.0156	0.191	101.241	68.4512	1.06333	30.4855

## Sheet: Amphibole-Represent analyses
Table 3. Representative EMP analyses of amphibole from the Tabaquito batholith.
Label	TAB-11			TAB-34					TAB-32
Rock Typea	Grd			Grd					MME
SiO2 wt%	66.02			65.05					55.04
Textureb	agr	agr	agr	s-c, c	s-c, r	s-c, r	agr	agr	inc Plg, r	inc Plg, c	mtx	mtx	agr	agr	agr	inc Plg, r	inc Plg, c	agr
SiO2	48.844	48.4133	50.819	46.7	48.72	47.5	48.88	52.17	50.01	47.69	50.7	49.42	51.49	51.5	49.79	50.94	46.35	50.96
TiO2	0.113	0.405	0.154	1.6095	0.9415	0.8475	0.7086	0.2298	0.9277	1.2935	1.2011	0.7814	0.5311	0.6692	0.9437	0.6459	1.5813	0.5296
Al2O3	5.571	6.051	4.075	7.46	6.7	7.36	6.11	3.61	6.05	6.72	5.27	6.29	5.29	4.84	5.99	5.13	8.04	4.94
FeO	17.431	17.17	16.237	18.11	18.43	19.25	17.42	15.81	14.74	15.67	14.38	16.15	14.47	14.52	15.44	15.1	17.36	15.27
Cr2O3	0.001	0.022	0.045	0	0	0.0536	0	0.0431	0	0	0	0.0756	0.2498	0.1086	0.1623	0	0.2366
MnO	0.71	0.754	0.8	0.7033	0.6776	0.7743	0.7879	0.7095	0.592	0.6312	0.7864	0.6852	0.7698	0.7367	0.7437	0.7036	0.4887	0.7191
MgO	12.679	12.563	13.836	10.72	11.37	10.76	11.28	13.35	13.24	12.32	13.09	12.19	12.48	13.65	12.48	13.31	10.78	13.66
CaO	11.332	11.692	11.585	11.47	11.71	11.5	11.44	11.67	11.94	11.74	11.67	11.87	11.47	11.37	11.28	11.78	11.66	11.33
Na2O	0.948	0.906	0.639	1.43	1.0769	1.1863	1.0389	0.5516	0.8985	1.1722	0.9786	0.9593	1.0404	0.8587	1.0355	0.8554	1.2078	0.9189
K2O	0.437	0.413	0.289	0.7866	0.669	0.7631	0.6198	0.3246	0.5724	0.6727	0.4756	0.6281	0.4266	0.3364	0.5001	0.4519	0.875	0.413
F	0.204	0.185	0.021	0	0	0	0	0.081	0.0275	0.299	0.3288	0.1082	0.1095	0	0	0	0.1078
Cl	0.218	0.074	0.047	0.1535	0.1084	0.1443	0.1471	0.0629	0.0556	0.0751	0.0707	0.0773	0.0911	0.0548	0.0858	0.0554	0.1269
Total	98.488	98.6483	98.547	99.1429	100.403	100.139	98.4323	98.6125	99.0537	98.2837	98.9512	99.2351	98.4183	98.6444	98.4511	98.9722	98.8141	98.7406
–O = F + Cl	0.135091	0.0945943	0.0194486	0.0346403	0.0244626	0.0325642	0.0331961	0.0482999	0.0241262	0.142843	0.154397	0.0630022	0.0666638	0.0123667	0.0193625	0.0125021	0.074027
Total	98.3529	98.5537	98.5276	99.1083	100.379	100.107	98.3991	98.5642	99.0296	98.1409	98.7968	99.1721	98.3516	98.632	98.4317	98.9597	98.7401
Formula based on 23 oxygens
Si	7.08945	7.02562	7.28829	6.86655	7.01774	6.88883	7.16762	7.50678	7.19204	6.99904	7.32254	7.15994	7.4649	7.36529	7.20595	7.31507	6.8319	7.28691
Ti	0.0123328	0.0441935	0.0166075	0.177949	0.101975	0.0924219	0.0781318	0.0248637	0.10032	0.142745	0.130442	0.0851262	0.0578976	0.071965	0.102699	0.0697442	0.175262	0.0569436
AlIV	0.910553	0.974378	0.688743	1.13345	0.982264	1.11117	0.832382	0.49322	0.807958	1.00096	0.677463	0.840063	0.535105	0.634711	0.794049	0.684932	1.1681	0.713092
AlVI	0.0423846	0.0604719	0	0.159228	0.155087	0.146769	0.223499	0.118947	0.217413	0.161324	0.21954	0.233895	0.368725	0.181041	0.22761	0.183242	0.228514	0.119383
fe+3	0.971529	0.85618	0.905846	0.44959	0.585492	0.725132	0.446985	0.508237	0.355209	0.402945	0.224003	0.356977	0.087638	0.513873	0.461684	0.416711	0.369345	0.678426
fe+2	1.14404	1.22732	1.04134	1.77702	1.63433	1.60932	1.68898	1.39401	1.41733	1.52007	1.51266	1.59953	1.66654	1.22254	1.40684	1.39646	1.77031	1.14739
Cr	0.000114748	0.00252399	0.00510219	0	0	0.00614556	0	0.00490292	0	0	0	0.00865911	0.0286311	0.0122788	0.01857	0	0.0275709
Mn	0.0860635	0.09138	0.0958184	0.0863618	0.0815122	0.0937822	0.0964882	0.0852599	0.0711011	0.0773638	0.0948542	0.0829055	0.0932048	0.0879899	0.089889	0.084381	0.060158	0.0858742
Mg	2.74354	2.71793	2.95825	2.34986	2.4416	2.32642	2.46591	2.86378	2.83863	2.69555	2.8185	2.6329	2.69737	2.91032	2.6927	2.84946	2.36884	2.91199
Ca	1.7621	1.81774	1.77999	1.80679	1.80704	1.78678	1.79718	1.79898	1.83959	1.84587	1.8057	1.84238	1.7815	1.74207	1.74896	1.81229	1.84125	1.73566
Na	0.266758	0.254892	0.177668	0.40763	0.300728	0.333545	0.295342	0.153874	0.250508	0.33352	0.27401	0.269444	0.292422	0.238085	0.290541	0.238143	0.34514	0.254736
K	0.080908	0.0764503	0.0528696	0.147531	0.122921	0.14117	0.115932	0.0595786	0.105004	0.125934	0.0876202	0.116076	0.0788916	0.0613688	0.0923241	0.0827772	0.164516	0.0753309
F	0.0936284	0.0848923	0.00952347	0	0	0	0	0.0368548	0.0125056	0.138758	0.150163	0.049569	0.0501986	0	0	0	0.0502443
Cl	0.05355	0.0181741	0.0114077	0.0381972	0.0264253	0.0354177	0.0365055	0.0153174	0.0135323	0.0186532	0.0172812	0.0189534	0.0223522	0.0132637	0.0210154	0.0134639	0.0316559
NaA	0.0288545	0.0726283	0	0.214417	0.107771	0.120327	0.0925224	0	0.0901006	0.179391	0.0797137	0.111824	0.073923	0	0.0395023	0.0504281	0.186386	0
A	0.109763	0.149079	0.0528696	0.361948	0.230692	0.261497	0.208455	0.0595786	0.195104	0.305325	0.167334	0.2279	0.152815	0.0613688	0.131826	0.133205	0.350902	0.0753309
Mg/(Mg + Fe+2)	0.70572	0.688912	0.739638	0.569404	0.599029	0.591101	0.593496	0.672597	0.666977	0.639419	0.650749	0.622077	0.618109	0.704191	0.656829	0.671105	0.5723	0.717349
a Grd, granodiorite; MME, mafic microgranular enclave.
b agr, aggregate; c, core; inc Plg, included in plagioclase; mtx, matrix; r, rim; s-c, single crystal.

## Sheet: Amphibole-Complete analyses
Table 4. Complete EMP analyses of amphibole from the Tabaquito batholith.
Sample	Analysis Number	Locationa	SiO2	TiO2	Al2O3	FeO	Cr2O3	MnO	MgO	CaO	Na2O	K2O	F	Cl	Total	–O = F + Cl	Total	Formula based on 23 oxygens	Si	Ti	AlIV	AlVI	fe+3	fe+2	Cr	Mn	Mg	Ca	Na	K	F	Cl	NaA	A	Mg/(Mg + Fe+2)
TAB11	TAB 11 - C12 - Amp 10	-	48.955	0.498	5.759	16.773	0.005	0.788	12.793	11.662	0.846	0.448	0.165	0.09	98.782	0.089784	98.6922		7.08104	0.0541642	0.918958	0.0627382	0.813119	1.21556	0.000571762	0.0951888	2.75865	1.80715	0.237235	0.0826584	0.0754676	0.0220315	0.0443886	0.127047	0.694138
TAB11	TAB 11 - C12 - Amp 13	-	47.777	0.318	5.976	17.293	0.043	0.775	12.556	11.431	1.102	0.461	0.177	0.176	98.085	0.114244	97.9708		6.98502	0.034959	1.01498	0.0146729	0.946254	1.16783	0.00497007	0.0946259	2.73669	1.79042	0.312348	0.0859724	0.0818274	0.0435475	0.102769	0.188741	0.700903
TAB11	TAB 11 - C12 - Amp 14	-	49.33	0.211	5.04	16.627	0.019	0.749	13.297	11.508	0.732	0.386	0.103	0.041	98.043	0.0526209	97.9904		7.14167	0.0229696	0.858331	0.00157135	0.962141	1.05068	0.00217464	0.0905586	2.8699	1.78489	0.205451	0.0712828	0.0471522	0.0100456	0	0.0712828	0.732009
TAB11	TAB 11 - C12 - Amp 15	-	48.481	0.226	6.018	17.466	0	0.811	12.595	11.466	0.958	0.432	0.095	0.204	98.752	0.0860367	98.666		7.01824	0.0246007	0.981761	0.044928	0.982516	1.13172	0	0.0980476	2.71819	1.77824	0.268863	0.0797718	0.0434867	0.0499791	0.0471029	0.126875	0.70604
TAB11	TAB 11 - C6 - Amp 16	agr	48.844	0.113	5.571	17.431	0.001	0.71	12.679	11.332	0.948	0.437	0.204	0.218	98.488	0.135091	98.3529		7.08945	0.0123328	0.910553	0.0423846	0.971529	1.14404	0.000114748	0.0860635	2.74354	1.7621	0.266758	0.080908	0.0936284	0.05355	0.0288545	0.109763	0.70572
TAB11	TAB 11 - C6 - Amp 17	agr	48.4133	0.405	6.051	17.17	0.022	0.754	12.563	11.692	0.906	0.413	0.185	0.074	98.6483	0.0945943	98.5537		7.02562	0.0441935	0.974378	0.0604719	0.85618	1.22732	0.00252399	0.09138	2.71793	1.81774	0.254892	0.0764503	0.0848923	0.0181741	0.0726283	0.149079	0.688912
TAB11	TAB 11 - C6 - Amp 18	agr	50.819	0.154	4.075	16.237	0.045	0.8	13.836	11.585	0.639	0.289	0.021	0.047	98.547	0.0194486	98.5276		7.28829	0.0166075	0.688743	0	0.905846	1.04134	0.00510219	0.0958184	2.95825	1.77999	0.177668	0.0528696	0.00952347	0.0114077	0	0.0528696	0.739638
TAB34	TAb 34 - C1 - Amp 1	s-c, c	46.7	1.6095	7.46	18.11	0	0.7033	10.72	11.47	1.43	0.7866	0	0.1535	99.1429	0.0346403	99.1083		6.86655	0.177949	1.13345	0.159228	0.44959	1.77702	0	0.0863618	2.34986	1.80679	0.40763	0.147531	0	0.0381972	0.214417	0.361948	0.569404
TAB34	TAb 34 - C1 - Amp 7	s-c, r	48.72	0.9415	6.7	18.43	0	0.6776	11.37	11.71	1.0769	0.669	0	0.1084	100.403	0.0244626	100.379		7.01774	0.101975	0.982264	0.155087	0.585492	1.63433	0	0.0815122	2.4416	1.80704	0.300728	0.122921	0	0.0264253	0.107771	0.230692	0.599029
TAB34	TAb 34 - C1 - Amp 8	s-c, r	47.5	0.8475	7.36	19.25	0.0536	0.7743	10.76	11.5	1.1863	0.7631	0	0.1443	100.139	0.0325642	100.107		6.88883	0.0924219	1.11117	0.146769	0.725132	1.60932	0.00614556	0.0937822	2.32642	1.78678	0.333545	0.14117	0	0.0354177	0.120327	0.261497	0.591101
TAB34	TAb 34 - C3 - Amp 12	agr	48.82	0.8733	6.3	17.87	0.1077	0.7764	11.31	11.38	0.9577	0.6321	0.0269	0.101	99.1551	0.034119	99.121		7.09604	0.0954476	0.903958	0.17521	0.594256	1.57768	0.012376	0.0942461	2.45079	1.77208	0.269871	0.117196	0.0123637	0.0248451	0.041948	0.159144	0.608368
TAB34	TAb 34 - C3 - Amp 13	agr	48.51	0.4135	6.41	18.28	0.1076	0.8249	11.2	11.61	0.9693	0.6805	0.1607	0.1314	99.2979	0.0973162	99.2006		7.07526	0.0453492	0.924744	0.177047	0.615676	1.61374	0.012407	0.100478	2.43531	1.81412	0.27408	0.126604	0.0741145	0.0324345	0.088196	0.2148	0.601453
TAB34	TAb 34 - C3 - Amp 14	agr	48.88	0.7086	6.11	17.42	0	0.7879	11.28	11.44	1.0389	0.6198	0	0.1471	98.4323	0.0331961	98.3991		7.16762	0.0781318	0.832382	0.223499	0.446985	1.68898	0	0.0964882	2.46591	1.79718	0.295342	0.115932	0	0.0365055	0.0925224	0.208455	0.593496
TAB34	TAb 34 - C3 - Amp 15	agr	52.17	0.2298	3.61	15.81	0.0431	0.7095	13.35	11.67	0.5516	0.3246	0.081	0.0629	98.6125	0.0482999	98.5642		7.50678	0.0248637	0.49322	0.118947	0.508237	1.39401	0.00490292	0.0852599	2.86378	1.79898	0.153874	0.0595786	0.0368548	0.0153174	0	0.0595786	0.672597
TAB34	TAb 34 - C3 - Amp 16	agr	48.41	0.7765	6.01	18.05	0.0214	0.6901	11.29	11.52	0.9265	0.5871	0.3192	0.0669	98.6677	0.149497	98.5182		7.10349	0.0856765	0.896506	0.142795	0.584479	1.63023	0.00248254	0.0845685	2.46977	1.81097	0.263567	0.10989	0.148107	0.0166136	0.074537	0.184427	0.602382
TAB34	TAb 34 - C3 - Amp 17	agr	53.41	0.3928	3.35	16.32	0	0.8202	13.9	11.74	0.547	0.275	0	0.0396	100.795	0.00893653	100.786		7.48949	0.0414175	0.510512	0.0430989	0.659325	1.25428	0	0.0960525	2.90582	1.76368	0.148705	0.0491894	0	0.0093978	0	0.0491894	0.698498
TAB34	TAb 34 - C3 - Amp 18	agr	47.95	0.7354	6.68	18.24	0.0216	0.7107	11.2	11.94	0.9688	0.6834	0.0269	0.0945	99.2513	0.0326521	99.2186		7.00904	0.0808307	0.990963	0.159774	0.525456	1.70399	0.00249614	0.0867592	2.44069	1.8698	0.274544	0.127425	0.0124336	0.0233778	0.144348	0.271772	0.588872
TAB34	TAb 34 - C3 - Amp 19	agr	54.35	0.3023	1.4006	13.67	0.0766	0.6673	15.12	11.91	0.3285	0.0992	0	0.025	97.9495	0.00564175	97.9439		7.77988	0.0325383	0.220122	0.0161529	0.368055	1.26818	0.00866856	0.0797726	3.22664	1.82645	0.0911627	0.0181131	0	0.0060564	0	0.0181131	0.717858
TAB34	TAb 34 - C3 - Amp 20	agr	49.37	0.8281	6.02	17.37	0	0.9158	11.91	11.2	0.9892	0.577	0.0808	0.1342	99.3951	0.064306	99.3308		7.12076	0.0898109	0.879245	0.144024	0.711591	1.38332	0	0.110312	2.56094	1.73062	0.276602	0.106157	0.0368511	0.032758	0.00722664	0.113383	0.649283
TAB34	TAB 34 - C5 - Amp 80	r	51.07	0.6905	5.45	14.62	0.0325	0.7509	13.29	11.64	0.9345	0.4554	0.1089	0.0635	99.1062	0.0601827	99.046		7.31961	0.0744165	0.680387	0.240167	0.370186	1.38197	0.00368257	0.0898802	2.8397	1.7873	0.259663	0.0832577	0.0493545	0.0154027	0.0469618	0.13022	0.672648
TAB34	TAB 34 - C5 - Amp 81	r	48.8	0.9195	5.69	15.84	0.0431	0.7257	12.76	11.65	0.9164	0.4761	0.2194	0.0952	98.1354	0.113863	98.0215		7.11967	0.100873	0.88033	0.0979927	0.586004	1.3464	0.00497121	0.0884212	2.77534	1.82091	0.259199	0.0886028	0.101217	0.023506	0.0801065	0.168709	0.673341
TAB32	TAB 32 - C1 - Amp 1	inc Plg, r	50.01	0.9277	6.05	14.74	0	0.592	13.24	11.94	0.8985	0.5724	0.0275	0.0556	99.0537	0.0241262	99.0296		7.19204	0.10032	0.807958	0.217413	0.355209	1.41733	0	0.0711011	2.83863	1.83959	0.250508	0.105004	0.0125056	0.0135323	0.0901006	0.195104	0.666977
TAB32	TAB 32 - C1 - Amp 2	inc Plg, c	47.69	1.2935	6.72	15.67	0	0.6312	12.32	11.74	1.1722	0.6727	0.299	0.0751	98.2837	0.142843	98.1409		6.99904	0.142745	1.00096	0.161324	0.402945	1.52007	0	0.0773638	2.69555	1.84587	0.33352	0.125934	0.138758	0.0186532	0.179391	0.305325	0.639419
TAB32	TAB 32 - C1 - Amp 3	inc Plg, r	50.49	0.7187	5.7	14.81	0	0.5754	13.18	11.72	1.0068	0.4684	0	0.0818	98.7511	0.0184598	98.7326		7.27188	0.0778345	0.728115	0.239375	0.349125	1.43448	0	0.0692103	2.82997	1.80839	0.281121	0.0860533	0	0.0199387	0.089507	0.17556	0.663618
TAB32	TAB 32 - C1 - Amp 4	inc Plg, c	50.51	0.8114	5.97	15.04	0.1526	0.5013	13.06	12.29	0.8895	0.5469	0	0.0536	99.8253	0.0120959	99.8132		7.23628	0.087409	0.763723	0.244234	0.207782	1.59394	0.0172837	0.0599784	2.78937	1.8863	0.247054	0.0999435	0	0.0129958	0.133358	0.233301	0.636361
TAB32	TAB 32 - C1 - Amp 5	inc Plg, r	50.12	1.1573	5.76	15.54	0.0979	0.6569	13.09	12.2	0.7679	0.5432	0.2464	0.0625	100.242	0.117852	100.124		7.16681	0.124435	0.833191	0.137469	0.385938	1.47216	0.0110673	0.0784465	2.79048	1.86894	0.212877	0.0990794	0.111412	0.015125	0.0818214	0.180901	0.654637
TAB32	TAB 32 - C1 - Amp 7	inc Plg, c	51.75	0.7873	5.05	13.3	0.0654	0.6561	13.61	11.93	0.9015	0.4336	0.2204	0.0542	98.7585	0.105031	98.6535		7.4498	0.0852232	0.550197	0.306557	0.0547078	1.54628	0.00744316	0.0788795	2.92091	1.83991	0.251599	0.0796219	0.100328	0.0132049	0.0915097	0.171132	0.653857
TAB32	TAB 32 - C1 - Amp 8	inc Plg, r	50.89	0.8998	4.99	14.45	0.0434	0.6379	13.59	11.82	0.8982	0.4794	0.2727	0.0687	99.0401	0.130325	98.9098		7.3217	0.0973438	0.678305	0.167772	0.328647	1.40975	0.00493644	0.0766463	2.9149	1.82188	0.25053	0.0879805	0.124063	0.0167277	0.0724056	0.160386	0.674019
TAB32	TAB 32 - C1 - Amp 11	mtx	50.7	1.2011	5.27	14.38	0	0.7864	13.09	11.67	0.9786	0.4756	0.3288	0.0707	98.9512	0.154397	98.7968		7.32254	0.130442	0.677463	0.21954	0.224003	1.51266	0	0.0948542	2.8185	1.8057	0.27401	0.0876202	0.150163	0.0172812	0.0797137	0.167334	0.650749
TAB32	TAB 32 - C1 - Amp 12	mtx	49.42	0.7814	6.29	16.15	0.0756	0.6852	12.19	11.87	0.9593	0.6281	0.1082	0.0773	99.2351	0.0630022	99.1721		7.15994	0.0851262	0.840063	0.233895	0.356977	1.59953	0.00865911	0.0829055	2.6329	1.84238	0.269444	0.116076	0.049569	0.0189534	0.111824	0.2279	0.622077
TAB32	TAB 32 - C3 - Amp 50	agr	51.49	0.5311	5.29	14.47	0.2498	0.7698	12.48	11.47	1.0404	0.4266	0.1095	0.0911	98.4183	0.0666638	98.3516		7.4649	0.0578976	0.535105	0.368725	0.087638	1.66654	0.0286311	0.0932048	2.69737	1.7815	0.292422	0.0788916	0.0501986	0.0223522	0.073923	0.152815	0.618109
TAB32	TAB 32 - C3 - Amp 51	agr	52.77	0.3702	3.87	13.44	0.316	0.7544	14.13	11.51	0.863	0.2836	0	0.0651	98.3723	0.0146911	98.3576		7.55579	0.0398577	0.444211	0.20882	0.297369	1.31178	0.0357705	0.0902098	3.0162	1.76559	0.239559	0.0517974	0	0.0157752	0.00514905	0.0569465	0.696908
TAB32	TAB 32 - C3 - Amp 52	agr	51.5	0.6692	4.84	14.52	0.1086	0.7367	13.65	11.37	0.8587	0.3364	0	0.0548	98.6444	0.0123667	98.632		7.36529	0.071965	0.634711	0.181041	0.513873	1.22254	0.0122788	0.0879899	2.91032	1.74207	0.238085	0.0613688	0	0.0132637	0	0.0613688	0.704191
TAB32	TAB 32 - C3 - Amp 53	agr	49.79	0.9437	5.99	15.44	0.1623	0.7437	12.48	11.28	1.0355	0.5001	0	0.0858	98.4511	0.0193625	98.4317		7.20595	0.102699	0.794049	0.22761	0.461684	1.40684	0.01857	0.089889	2.6927	1.74896	0.290541	0.0923241	0	0.0210154	0.0395023	0.131826	0.656829
TAB32	TAB 32 - C3 - Amp 54	agr	52.42	0.5559	4.29	13.72	0	0.6153	14.11	12.14	0.6371	0.3252	0.1649	0.0223	99.0007	0.074464	98.9262		7.49553	0.0597702	0.504474	0.21845	0.211133	1.42931	0	0.073477	3.00786	1.85971	0.176612	0.059315	0.0745593	0.00539649	0.0363244	0.0956394	0.677877
TAB32	TAB 32 - C3 - Amp 55	agr	49.84	0.7138	5.96	15.82	0.0757	0.5639	12.61	11.53	1.0469	0.5394	0	0.0972	98.7969	0.0219351	98.775		7.20239	0.0775636	0.797614	0.217406	0.453609	1.45804	0.00864847	0.068055	2.71668	1.78505	0.2933	0.0994302	0	0.023772	0.0783465	0.177777	0.650746
TAB32	TAB 32 - C5 - Amp 58	inc Plg, c	48.54	1.1496	7.04	16.76	0.1727	0.6533	11.95	11.79	1.22	0.6723	0	0.0761	100.024	0.0171735	100.007		6.99478	0.124567	1.00522	0.190356	0.441317	1.57822	0.0196749	0.0786224	2.56724	1.82016	0.340834	0.12358	0	0.0185593	0.160996	0.284575	0.61929
TAB32	TAB 32 - C5 - Amp 59	inc Plg, r	50.94	0.6459	5.13	15.1	0	0.7036	13.31	11.78	0.8554	0.4519	0	0.0554	98.9722	0.0125021	98.9597		7.31507	0.0697442	0.684932	0.183242	0.416711	1.39646	0	0.084381	2.84946	1.81229	0.238143	0.0827772	0	0.0134639	0.0504281	0.133205	0.671105
TAB32	TAB 32 - C5 - Amp 60	inc Plg, c	46.35	1.5813	8.04	17.36	0.2366	0.4887	10.78	11.66	1.2078	0.875	0.1078	0.1269	98.8141	0.074027	98.7401		6.8319	0.175262	1.1681	0.228514	0.369345	1.77031	0.0275709	0.060158	2.36884	1.84125	0.34514	0.164516	0.0502443	0.0316559	0.186386	0.350902	0.5723
TAB32	TAB 32 - C2 - Amp 17	agr	51.31	0.599	4.8	15.63	-	0.703	13.19	11.76	0.8778	0.4033	-	-	99.2731	-	99.2731		7.35118	0.0645305	0.64882	0.16163	0.430552	1.44193	0	0.0841143	2.81725	1.80503	0.243814	0.0737042	0	0	0.0488435	0.122548	0.661454
TAB32	TAB 32 - C2 - Amp 18	agr	51.3	0.8059	4.84	15.42	-	0.7353	13.74	11.73	0.9106	0.4143	-	-	99.8961	-	99.8961		7.28042	0.086001	0.71958	0.0899154	0.56524	1.26466	0	0.0871491	2.90704	1.78344	0.250539	0.0750003	0	0	0.0339808	0.108981	0.696848
TAB32	TAB 32 - C2 - Amp 19	agr	52.04	0.5078	4.6	14.48	-	0.7529	13.79	11.71	0.8446	0.3865	-	-	99.1118	-	99.1118		7.42302	0.0544652	0.576979	0.196292	0.388948	1.33814	0	0.0896892	2.93246	1.78946	0.233562	0.0703237	0	0	0.0230234	0.0933471	0.686662
TAB32	TAB 32 - C2 - Amp 21	agr	50.96	0.5296	4.94	15.27	-	0.7191	13.66	11.33	0.9189	0.413	-	-	98.7406	-	98.7406		7.28691	0.0569436	0.713092	0.119383	0.678426	1.14739	0	0.0858742	2.91199	1.73566	0.254736	0.0753309	0	0	0	0.0753309	0.717349
TAB32	TAB 32 - C2 - Amp 22	agr	50.06	0.6684	5.36	14.96	-	0.7108	13.34	11.61	1.0218	0.4418	-	-	98.1728	-	98.1728		7.24136	0.0727024	0.75864	0.155104	0.491626	1.3179	0	0.085869	2.8768	1.79922	0.286552	0.08152	0	0	0.0857687	0.167289	0.685819
TAB32	TAB 32 - C2 - Amp 23	agr	50.06	0.4376	5.57	15.4	-	0.8745	12.91	11.78	1.0297	0.4912	-	-	98.553	-	98.553		7.2464	0.0476312	0.753602	0.196602	0.428407	1.43563	0	0.105718	2.78601	1.82683	0.288968	0.0906982	0	0	0.1158	0.206498	0.659935
TAB32	TAB 32 - C2 - Amp 24	agr	50.35	0.8984	5.51	15.55	-	0.6947	13.11	11.95	0.8931	0.5121	-	-	99.4683	-	99.4683		7.2209	0.0968824	0.7791	0.152166	0.419098	1.44567	0	0.0832049	2.80298	1.83604	0.248313	0.0936819	0	0	0.0843516	0.178033	0.659734
TAB32	TAB 32 - C2 - Amp 25	agr	50.38	0.6913	5.68	15.51	-	0.6786	13.16	11.71	0.9598	0.5044	-	-	99.2741	-	99.2741		7.21706	0.0744649	0.78294	0.175977	0.505034	1.35284	0	0.0811849	2.8105	1.79714	0.266558	0.0921693	0	0	0.0636939	0.155863	0.675058
TAB32	TAB 32 - C2 - Amp 14	agr	57.22	0.0701	0.6833	12.3	-	0.785	16.93	11.73	0.2231	0.0648	-	-	100.006	-	100.006		7.89173	0.00726985	0.108275	0.00278726	0.553532	0.864978	0	0.0904177	3.48102	1.73318	0.059653	0.0114001	0	0	0	0.0114001	0.800971
TAB32	TAB 32 - C2 - Amp 15	agr	56.89	0.0929	0.661	12.35	-	0.8052	17.2	11.44	0.2556	0.0563	-	-	99.751	-	99.751		7.83606	0.0096219	0.107298	0	0.746891	0.675543	0	0.0926244	3.53196	1.68815	0.0682545	0.00989189	0	0	0	0.00989189	0.839443
TAB32	TAB 32 - C2 - Amp 16	agr	56.69	0.0464	0.7218	12.11	-	0.7315	17.51	11.63	0.2591	0.0647	-	-	99.7635	-	99.7635		7.80549	0.00480391	0.117123	0	0.750731	0.64352	0	0.0841138	3.59422	1.71552	0.0691623	0.0113634	0	0	0	0.0113634	0.848145
TAB32	TAB 32 - C2 - Amp 20	agr	56.26	0.1625	0.8644	12.48	-	0.5093	17	11.12	0.3272	0.0811	-	-	98.8045	-	98.8045		7.81341	0.0169698	0.141477	0	0.786296	0.663005	0	0.059071	3.51977	1.6545	0.0880973	0.0143672	0	0	0	0.0143672	0.841492
a agr, aggregate; c, core; inc Plg, included in plagioclase; mtx, matrix; r, rim; s-c, single crystal.
			agr	agr
			48.844	48.4133

## Sheet: Biotita-Complete analyses
Table 5. EMP analyses of biotite from the Tabaquito batholitha.
Label	TAB-11				TAB-34			TAB-32
Rock typeb	Grd				Grd			MME
SiO2 wt%	66.02				65.05			55.04
SiO2	36.671	36.951	36.777	36.787	35.99	36.32	35.77	36.84	36.89	37	37.26	36.35	37.02	36.72
TiO2	3.689	4.238	3.548	3.959	4.3	4.07	3.99	3.53	3.39	3.09	3.39	3.54	3.79	3.61
Al2O3	14.574	14.36	14.093	14.385	13.95	14.38	14.03	14.56	14.78	14.57	14.48	14.56	14.79	14.46
FeO	20.732	20.562	20.54	20.531	21.35	20.89	22.17	19.61	20.44	20.21	20.31	20.33	20.88	19.44
MnO	0.358	0.343	0.282	0.357	0.4298	0.3321	0.4202	0.3885	0.4043	0.3552	0.2587	0.4193	0.2824	0.3469
MgO	11.191	10.751	11.357	11.465	10.72	10.91	10.72	11.42	11.28	11.47	11.75	11.44	11.78	12.03
CaO	0	0.004	0	0	0.0252	0	0.0337	0.0205	0	0.0472	0.0058	0.037	0.0057	0.0344
Na2O	0.143	0.159	0.142	0.144	0.1184	0.1201	0.0892	0.0783	0.0382	0.1207	0.1029	0.0359	0.1414	0.0454
Cr2O3	0.029	0.029	0.048	0.036	0	0	0.0739	0.1275	0	0.0635	0.0424	0.074	0.1798	0.0211
ZnO	0.156	0.066	0	0.02
K2O	8.861	8.96	9.281	9.255	9.53	9.43	9.36	9.63	9.59	9.78	9.61	9.64	9.65	9.55
Li2O	0.0938654	0.10107	0.091288	0.0896499	0.101599	0.0984016	0.101599	0.0903288	0.0924744	0.0895748	0.0854677	0.0900264	0.0850389	0.0815463
F	0.189	0	0.258	0.177	0.1563	0.0259	0.0771	0.312	0.155	0.2835	0.1551	0.1031	0.3092	0.1574
Cl	0.161	0.159	0.187	0.148	0.0939	0.1332	0.1142	0.1175	0.1087	0.121	0.0756	0.1358	0.1028	0.0918
Total	96.8479	96.6831	96.6043	97.3536	96.7652	96.7097	96.9499	96.7246	97.1687	97.2007	97.526	96.7551	99.0163	96.5885
–O = F + Cl	0.115912	0.0358815	0.150832	0.107925	0.0870009	0.0409645	0.0582347	0.157885	0.0897935	0.146674	0.0823659	0.0740565	0.153388	0.0869902
Total	96.732	96.6472	96.4535	97.2457	96.6782	96.6687	96.8917	96.5667	97.0789	97.054	97.4436	96.6811	98.863	96.5016
Formula based on 22 oxygens
Si	5.55988	5.59356	5.60138	5.55087	5.50883	5.52878	5.48001	5.58753	5.57421	5.59975	5.5995	5.528	5.5094	5.56075
Ti	0.420566	0.482399	0.406336	0.449196	0.494913	0.465866	0.459641	0.402585	0.385175	0.351648	0.38308	0.404809	0.424121	0.411075
Al	2.60406	2.56181	2.5296	2.55804	2.51641	2.57972	2.53309	2.60251	2.63196	2.5987	2.56451	2.60949	2.59398	2.58065
Cr	0.00347605	0.00347061	0.00577969	0.00429452	0	0	0.00895059	0.0152882	0	0.00759776	0.00503752	0.00889693	0.0211545	0.00252615
Zn	0.0174554	0.00737342	0	0.0022272	0	0	0	0	0	0	0	0	0	0
Fe	2.62837	2.60274	2.61591	2.59048	2.73262	2.65904	2.84008	2.48703	2.58261	2.55762	2.55223	2.58526	2.59837	2.46167
Mn	0.045969	0.0439739	0.0363753	0.045622	0.0557164	0.0428145	0.0545202	0.0499034	0.0517389	0.045528	0.0329262	0.0540042	0.0355935	0.0444912
Mg	2.52951	2.42625	2.57874	2.57909	2.44623	2.4759	2.4484	2.58221	2.54103	2.58795	2.6325	2.59367	2.61359	2.71595
Ca	0	0.000648701	0	0	0.00413238	0	0.00553113	0.00333101	0	0.00765299	0.000933805	0.0060282	0.000908792	0.00558099
Na	0.0420327	0.0466625	0.0419291	0.0421248	0.0351348	0.0354434	0.0264933	0.0230234	0.0111904	0.0354146	0.0299799	0.0105844	0.0407967	0.0133289
K	1.7137	1.73013	1.80311	1.78136	1.86071	1.83107	1.82914	1.8631	1.84843	1.88806	1.84221	1.87004	1.83191	1.84477
Li	0.0572305	0.0615267	0.0559128	0.0543997	0.0625384	0.0602372	0.0625938	0.0550942	0.0561922	0.0545171	0.0516521	0.0550571	0.0508938	0.0496609
F	0.090611	0	0.124255	0.0844533	0.0756507	0.0124669	0.0373502	0.149634	0.0740599	0.135674	0.0737046	0.0495791	0.145507	0.0753723
Cl	0.0413114	0.0407344	0.0482016	0.0377947	0.0243246	0.0343154	0.0296094	0.0301606	0.0277975	0.0309923	0.0192278	0.0349514	0.0258918	0.0235275
Mg/(Mg+Fe2+)	0.490416	0.482453	0.496422	0.498898	0.47235	0.482167	0.462968	0.509388	0.495942	0.502947	0.507742	0.500812	0.50146	0.524555
a Li contents calculated from expressions derived by Tischendorf et al. (2004).
b Grd, granodiorite; MME, mafic microgranular enclave.

## Sheet: Epidote-Complete analyses
Table 6. EMP analyses of epidote from the Tabaquito batholith.
Label	TAB-34
Rock Type	Granodiorite
SiO2 wt%	65.05
SiO2	37.58	37.88	38	36.79
TiO2	0	0.0468	0.0939	0.0937
Al2O3	24.03	24.48	23.63	22.87
FeO	12.54	11.67	12.82	13.66
MnO	0.0984	0.4513	0.2882	0.2384
MgO	0.0331	0.0469	0.0223	0.0185
CaO	23.53	23.52	23.54	23.34
Na2O	0	0	0.0197	0.0155
Cr2O3	0	0	0.1546	0.0661
ThO2	0	0.0048	0	0
Ce2O3	0.0908	0.0485	0	0
Total	97.9023	98.1483	98.5687	97.0922
Ps (%)	24.9921	23.335	25.7278	27.6076
